# Supplementary material
Source: PubMed Central journal article supplement (PMC11040656)
Supplement: NIHMS1983085-supplement-Supplementary_Information.pdf [file NIHMS1983085-supplement-Supplementary_Information.pdf]

## Supplementary Information

**a**

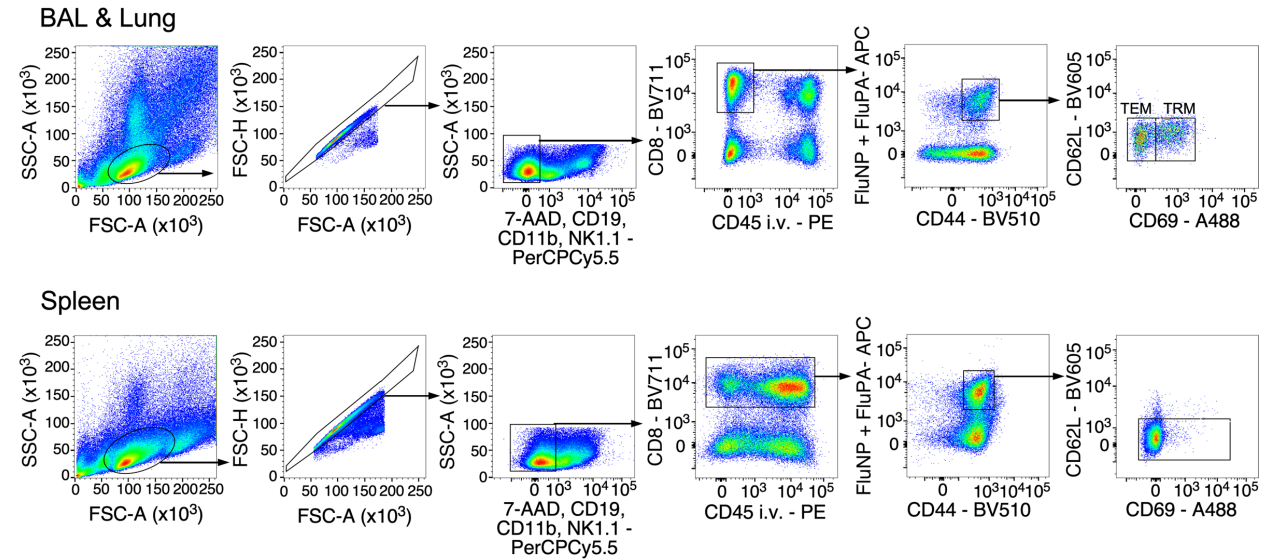

**b**

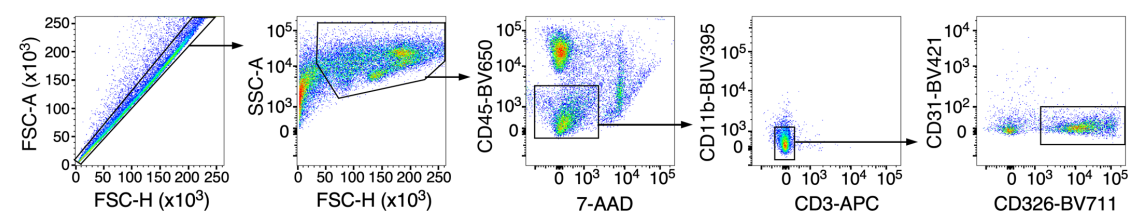

**Supplementary Information Fig 1. Flow cytometry sorting gating strategies for RNA sequencing analysis. (a)** Gating strategy used to sort antigen specific CD8 TRM from BAL and lung, and CD8 TEM from lung and spleen for transcriptional analysis (Fig. 2a-b). **(b)** Gating strategy used to sort nasal cavity epithelial cells (Fig. 4b-d).

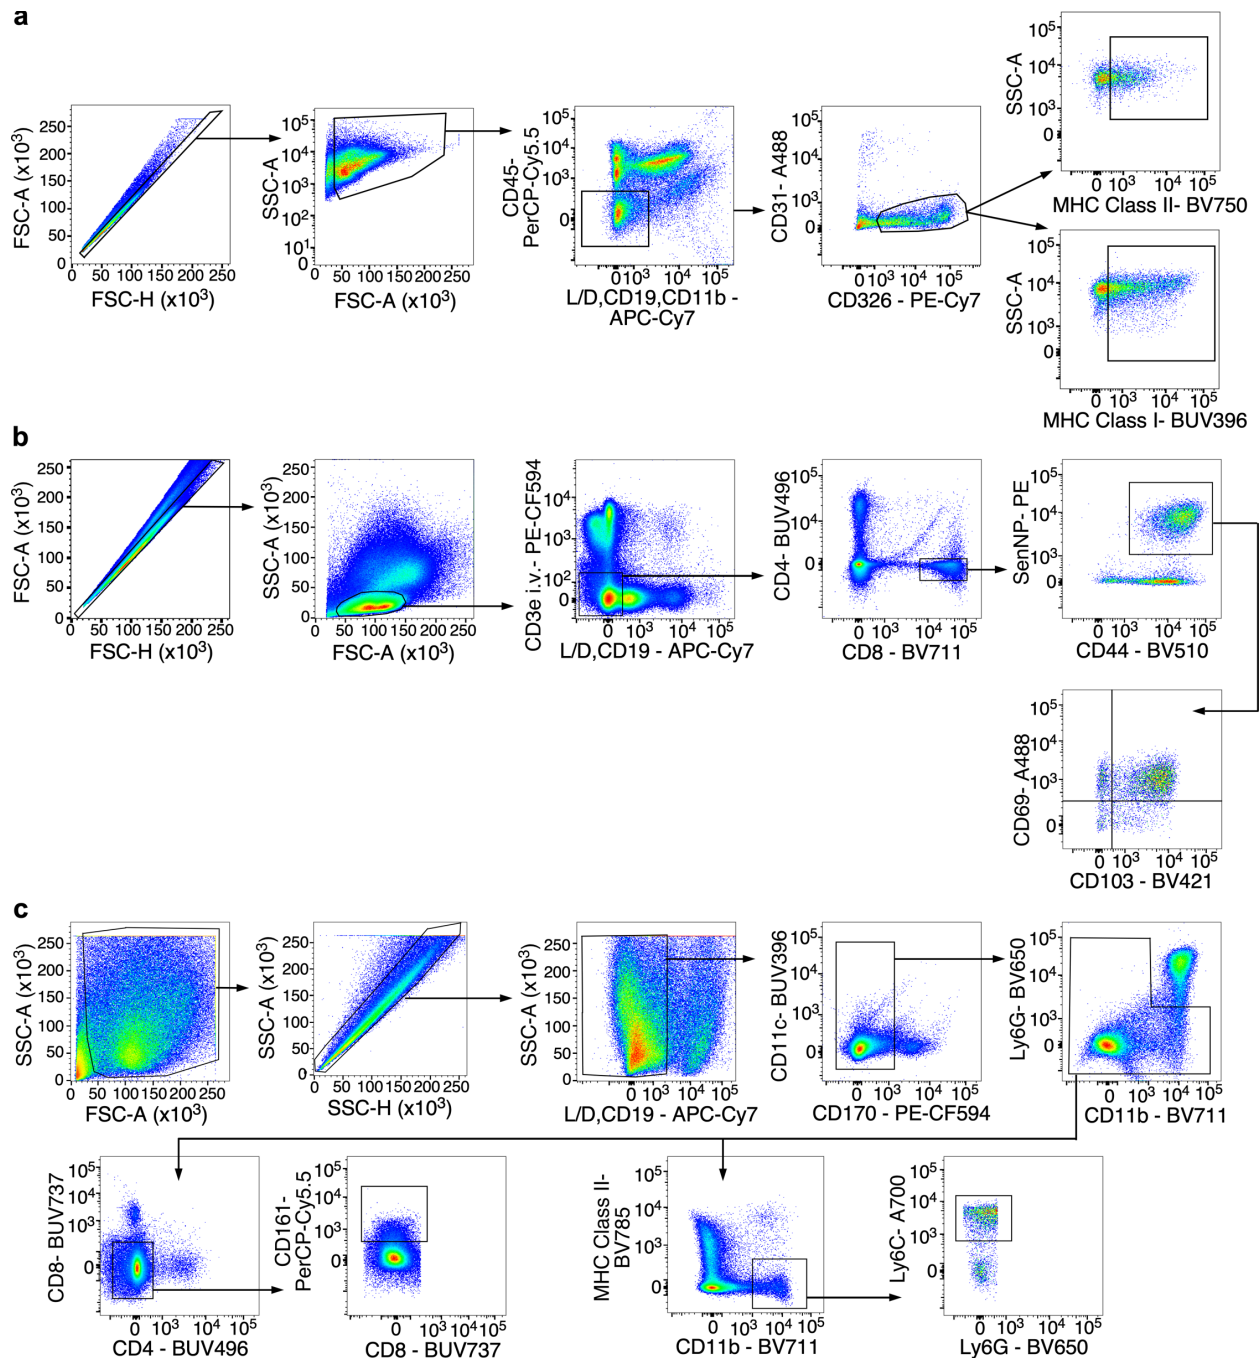

**Supplementary Information Fig 2. Flow cytometry gating strategies.** (a) Gating strategy used to identify MHC-I<sup>hi</sup> and MHC-II<sup>+</sup> epithelial cells in the nasal cavity (Fig. 4e-f). (b) Gating strategy used to identify antigen-specific CD8 T cells and CD103<sup>+</sup> CD69<sup>+</sup> SenNP<sup>+</sup> TRM in BAL, nasal cavity, lung, and spleen (Fig. 5e, Extended data Fig. 1 b-g, Extended data Fig. 3 b-d, Extended data Fig. 4b, Extended data Fig. 6b, Extended data Fig. 9b). (c) Gating strategy used to identify NK cells and inflammatory monocyte subsets (Extended data Fig. 4d, Extended data Fig. 5b-c).

**Supplementary Information Table 1**

| <b>Reagent</b>     | <b>Fluorophore</b> | <b>Clone #</b> | <b>Catalogue #</b> | <b>Vendor</b> |
|--------------------|--------------------|----------------|--------------------|---------------|
| antiCCR2           | BV605              | SA203G11       | 150615             | BioLegend     |
| antiCD103          | BV421              | 2E7            | 121421             | BioLegend     |
|                    | BB700              | 2E7            | 748240             | BD Bioscience |
|                    | BB515              | Ber-ACT8       | 564578             | BD Bioscience |
| antiCD11b          | BV711              | M1/70          | 101241             | BioLegend     |
|                    | UV395              | M1/70          | 563553             | BD Bioscience |
|                    | APC-eFluor 780     | M1/70          | 479112-82          | eBioscience   |
| antiCD11c          | UV395              | HL3            | 564080             | BD Bioscience |
|                    | UV737              | HL3            | 612797             | BD Bioscience |
| antiCD19           | APC-Cy7            | 1D3            | 152412             | BioLegend     |
|                    | APC-eFluor 780     | 1D3            | 470193-82          | eBioscience   |
| antiCD3            | APC                | 17A2           | 100236             | BioLegend     |
|                    | APC-eFluor 780     | 17A2           | 47-0032-82         | eBioscience   |
| antiCD3 $\epsilon$ | PE-CF594           | 145-2C11       | 562286             | BD Bioscience |
| antiCD31           | APC-Cy7            | 390            | 102440             | BioLegend     |
|                    | BV421              | 390            | 102424             | BioLegend     |
| antiCD4            | UV496              | GK1.5          | 612952             | BD Bioscience |
| antiCD44           | BV510              | IM7            | 103044             | BioLegend     |
|                    | BV480              | IM7            | 566116             | BD Bioscience |
|                    | A700               | IM7            | 560567             | BD Bioscience |
| antiCD45           | BV650              | 30-F11         | 103151             | BioLegend     |
|                    | PerCPCy5.5         | 30-F11         | 103132             | BioLegend     |
| antiCD45.2         | PE                 | 104            | 109808             | BioLegend     |
|                    | A700               | 104            | 56-0454-82         | eBioscience   |
| antiCD49a          | BV605              | Ha31/8         | 740375             | BD Bioscience |
| antiCD62L          | PE-Cy7             | MEL-14         | 104418             | BioLegend     |
| antiCD69           | A488               | H1.2F3         | 104506             | BioLegend     |
|                    | PE-Cy7             | H1.2F3         | 104512             | BioLegend     |
| antiCD8 $\alpha$   | BV711              | 53-6.7         | 100759             | BioLegend     |
|                    | BV785              | 53-6.7         | 100750             | BioLegend     |
|                    | UV737              | 53-6.7         | 612759             | BD Bioscience |

|                             |              |             |        |               |
|-----------------------------|--------------|-------------|--------|---------------|
| antiCXCR3                   | UV395        | CXCR3-173   | 745689 | BD Bioscience |
| antiCXCR6                   | BV711        | SA051D1     | 151111 | BioLegend     |
| antiEpCAM                   | PE-Cy7       | G8.8        | 118216 | BioLegend     |
|                             | BV711        | G8.8        | 118233 | BioLegend     |
| antiLy6C                    | A700         | HK1.4       | 128024 | BioLegend     |
|                             | A488         | HK1.4       | 128022 | BioLegend     |
| antiLy6G                    | BV650        | 1A8         | 127641 | BioLegend     |
|                             | BV510        | 1A8         | 127633 | BioLegend     |
| antiSiglecF                 | PE-Dazzle594 | S17007L     | 155530 | BioLegend     |
|                             | PE-CF594     | E50-2440    | 562757 | BD Bioscience |
| antiMHC-I (H-2K(b)/H-2D(b)) | UV395        | 28-8-6      | 745596 | BD Bioscience |
| antiMHC-II (I-A/I-E)        | BV785        | M5/114.15.2 | 107645 | BioLegend     |
| antiNK1.1                   | PerCp-Cy5.5  | PK136       | 108728 | BioLegend     |
|                             | BV711        | PK136       | 108745 | BioLegend     |
|                             | APC-Cy7      | PK136       | 108723 | BioLegend     |
| ZOMBIE-NIR                  | N/A          | N/A         | 423106 | BioLegend     |
| 7-AAD                       | N/A          | N/A         | 420404 | BioLegend     |

**Supplementary Information Table 1. Specificities, conjugated fluorophores, clone numbers, catalogue numbers, and vendors for flow cytometry reagents used in this study.**
